# Supplementary material for: Secondary organic aerosol formation from in situ OH, O 3 , and NO 3 oxidation of ambient forest air in an oxidation flow reactor
Source: Copernicus journal article supplement (doi:10.5194/acp-2016-1080), 2017-01-02
Supplement: Supplementary file 1 [file acp-2016-1080-supplement.pdf]

## Supplemental Information for:

### Secondary organic aerosol formation from in situ OH, O<sub>3</sub>, and NO<sub>3</sub> oxidation of ambient forest air in an oxidation flow reactor

Brett B. Palm<sup>1,2</sup>, Pedro Campuzano-Jost<sup>1,2</sup>, Amber M. Ortega<sup>1,3,\*</sup>, Douglas A. Day<sup>1,2</sup>, Juliane L. Fry<sup>4</sup>, Steven S. Brown<sup>2,5</sup>, Kyle J. Zarzana<sup>1,2,\*</sup>, William Dube<sup>1,5</sup>, Nicholas L. Wagner<sup>1,5</sup>, Danielle C. Draper<sup>4,#</sup>, Lisa Kaser<sup>6</sup>, Werner Jud<sup>7,^</sup>, Thomas Karl<sup>8</sup>, Armin Hansel<sup>7</sup>, Cándido Gutiérrez-Montes<sup>9</sup>, and Jose L. Jimenez<sup>1,2</sup>

<sup>1</sup>Cooperative Institute for Research in Environmental Sciences, University of Colorado, USA;

<sup>2</sup>Department of Chemistry and Biochemistry, University of Colorado, USA;

<sup>3</sup>Department of Atmospheric and Oceanic Science, University of Colorado, USA;

<sup>4</sup>Department of Chemistry, Reed College, USA;

<sup>5</sup>NOAA Earth System Research Laboratory, Chemical Sciences Division, Boulder, CO, USA

<sup>6</sup>National Center for Atmospheric Research, USA;

<sup>7</sup>Institute of Ion Physics and Applied Physics, University of Innsbruck, Austria;

<sup>8</sup>Institute of Atmospheric and Cryospheric Sciences, University of Innsbruck, Austria;

<sup>9</sup>Departamento de Ingeniería, Mecánica y Minera, Universidad de Jaen, Jaen, Spain

<sup>\*</sup>Now at Air Pollution Control Division, Colorado Department of Public Health and Environment, Denver, CO, USA

<sup>\*</sup>Now at NOAA Earth System Research Laboratory, Chemical Sciences Division, Boulder, CO, USA

<sup>#</sup>Now at Department of Chemistry, University of California, Irvine, USA

<sup>^</sup>Now at Research Unit Environmental Simulation (EUS), Institute of Biochemical Plant Pathology (BIOP), Helmholtz Zentrum München GmbH, Germany

#### **S1 NO<sub>3</sub> oxidant modeling**

To estimate NO<sub>3</sub> exposure in the OFR when injecting N<sub>2</sub>O<sub>5</sub>, the KinSim chemical-kinetic integrator (version 3.10) was used. Table S1 contains the reactions and rate constant parameters implemented in the model. The model was run with a residence time calculated from the total measured flow in the OFR (between 150 and 240 s). The model was run using this research site's ambient pressure of 770 mbar, and was initialized with measurements of ambient temperature, RH, O<sub>3</sub> concentrations, monoterpene (MT) concentrations, a constant 0.15 ppb NO, and injected NO<sub>2</sub>, NO<sub>3</sub>, and N<sub>2</sub>O<sub>5</sub> concentrations for each data point. The N<sub>2</sub>O<sub>5</sub> wall loss rate constant  $k_{wall}$ , shown in Fig. S4a, was empirically determined to have a base value of 0.014 s<sup>-1</sup> (lifetime of 71 s) using the measured N<sub>2</sub>O<sub>5</sub> difference between the injection flow and OFR output concentrations while injecting N<sub>2</sub>O<sub>5</sub> into dry zero air in the reactor. Using measurements when injecting into ambient air, an empirical increase in this wall loss rate was required when RH was greater than 80% in order to reproduce the concentrations of N<sub>2</sub>O<sub>5</sub> injected and remaining in the OFR output (see Fig. 2a). Figure S4b shows the modeled vs. measured N<sub>2</sub>O<sub>5</sub> remaining, illustrating the need for the increasing wall loss rate at high RH. The base wall loss rate of 0.014 s<sup>-1</sup> is several times faster than

the wall loss rate of  $0.0025\text{ s}^{-1}$  estimated in Palm et al. (2016) for condensable organic gases (LVOCs) produced by oxidation in the OFR. This empirical result may be a consequence of the  $\text{N}_2\text{O}_5$  flow being injected through a Teflon ring that was mounted close to the OFR wall, increasing the effective surface-area-to-volume ratio experienced by the injected  $\text{N}_2\text{O}_5$ . Injection near the wall may also have been the cause for the relatively large increase in wall loss rate at high RH. The  $\text{N}_2\text{O}_5$  wall loss rate also implicitly includes any losses on the sampling line walls after the OFR, which also had higher surface-area-to-volume ratios that would likely lead to larger apparent loss rates. The  $\text{NO}_3$  wall loss rate was assumed to be equal to the  $\text{N}_2\text{O}_5$  wall loss rate (and has little effect on the key model outputs). The rate constant for reactive uptake of  $\text{N}_2\text{O}_5$  onto particulate water surfaces,  $k_{aer}$ , is shown as a function of RH in Fig. S5. It was calculated using the measured ambient aerosol condensational sink using the same method described for condensation of LVOCs onto aerosols in Palm et al (2016), except using an organic-mass-fraction-corrected uptake efficiency  $\gamma(\text{N}_2\text{O}_5)$  from Gaston et al. (2014). This heterogeneous uptake was typically several orders of magnitude slower than the wall loss rate, and was therefore a minor loss pathway for  $\text{N}_2\text{O}_5$ .

Time constraints prevented the full characterization of the flow characteristics of the experimental setup during the field measurements. Instead, PTR-TOF-MS measurements of the decay of ambient MT in the OFR were used to parameterize the mixing process. With relatively robust constraints provided by measurements of  $\text{N}_2\text{O}_5$ ,  $\text{NO}_2$ , and  $\text{NO}_3$ , the model results make it clear that a well-mixed OFR would contain more than enough  $\text{NO}_3$  to react virtually all ambient biogenic gases, if gases were immediately well-mixed. However, the PTR-TOF-MS measurements verified that substantial amounts of MT often remained in the OFR output. Incomplete mixing of the injected  $\text{N}_2\text{O}_5$  was the most likely explanation for this observation. A parameterization for the time constant needed for mixing of the injected  $\text{N}_2\text{O}_5$  flow with ambient air at the entrance of the OFR was added to the model to provide an effective empirical mixing time scale of 100 s. This parameterization for mixing has the same effect as the high wall loss rates of  $\text{N}_2\text{O}_5$ , which is to decrease the concentrations of oxidant experienced by MT inside the reactor. The true time scale of mixing and wall loss rate may be somewhat different, but the model results presented herein suggest the values used in this work capture the net behavior satisfactorily. The time series of measured and modeled MT decay are shown in Fig. S6–7, which are in addition to the example given in Fig. 4.

64    **References**

- 65    Atkinson, R. and Arey, J.: Gas-phase tropospheric chemistry of biogenic volatile organic compounds: a  
66    review, *Atmos. Environ.*, 37, 197–219, doi:10.1016/S1352-2310(03)00391-1, 2003.
- 67    Atkinson, R., Baulch, D. L., Cox, R. A., Crowley, J. N., Hampson, R. F., Hynes, R. G., Jenkin, M. E., Rossi, M.  
68    J. and Troe, J.: Evaluated kinetic and photochemical data for atmospheric chemistry: Volume I - gas  
69    phase reactions of O<sub>x</sub>, HO<sub>x</sub>, NO<sub>x</sub> and SO<sub>x</sub> species, *Atmos. Chem. Phys.*, 4, 1461–1738, doi:10.5194/acp-4-  
70    1461-2004, 2004.
- 71    Atkinson, R., Baulch, D. L., Cox, R. A., Crowley, J. N., Hampson, R. F., Hynes, R. G., Jenkin, M. E., Rossi, M.  
72    J., Troe, J. and IUPAC Subcommittee: Evaluated kinetic and photochemical data for atmospheric  
73    chemistry: Volume II - gas phase reactions of organic species, *Atmos. Chem. Phys.*, 6, 3625–4055,  
74    doi:10.5194/acp-6-3625-2006, 2006.
- 75    Gaston, C. J., Thornton, J. A. and Ng, N. L.: Reactive uptake of N<sub>2</sub>O<sub>5</sub> to internally mixed inorganic and  
76    organic particles: the role of organic carbon oxidation state and inferred organic phase separations,  
77    *Atmos. Chem. Phys.*, 14, 5693–5707, doi:10.5194/acp-14-5693-2014, 2014.
- 78    Lambe, A. T., Ahern, A. T., Williams, L. R., Slowik, J. G., Wong, J. P. S., Abbatt, J. P. D., Brune, W. H., Ng, N.  
79    L., Wright, J. P., Croasdale, D. R., Worsnop, D. R., Davidovits, P. and Onasch, T. B.: Characterization of  
80    aerosol photooxidation flow reactors: heterogeneous oxidation, secondary organic aerosol formation  
81    and cloud condensation nuclei activity measurements, *Atmos. Meas. Tech.*, 4, 445–461,  
82    doi:10.5194/amt-4-445-2011, 2011.
- 83    Palm, B. B., Campuzano-Jost, P., Ortega, A. M., Day, D. A., Kaser, L., Jud, W., Karl, T., Hansel, A., Hunter, J.  
84    F., Cross, E. S., Kroll, J. H., Peng, Z., Brune, W. H. and Jimenez, J. L.: In situ secondary organic aerosol  
85    formation from ambient pine forest air using an oxidation flow reactor, *Atmos. Chem. Phys.*, 16, 2943–  
86    2970, doi:10.5194/acp-16-2943-2016, 2016.
- 87    Sander, S. P., Abbatt, J. P. D., Barker, J. R., Burkholder, J. B., Friedl, R. R., Golden, D. M., Huie, R. E., Kolb,  
88    C. E., Kurylo, M. J., Moortgat, G. K., Orkin, V. L. and Wine, P. H.: Chemical Kinetics and Photochemical  
89    Data for Use in Atmospheric Studies Evaluation Number 17, JPL Publ. 10-6, Jet Propulsion Laboratory,  
90    California Institute of Technology, Pasadena, CA, USA, 2011.

91

## Tables

**Table S1.** List of reactions and parameters used in modeling of the oxidant chemistry in the OFR when performing NO<sub>3</sub> oxidation. The rate constants are calculated using the modified Arrhenius equation  $k = A \cdot \left(\frac{T(K)}{300}\right)^{-n} \cdot e^{-\frac{E}{RT(K)}}$  with pressure dependence as described in Sect. 2 of JPL (Sander et al., 2011). Parameter values are from JPL, with exceptions noted.

| Reactant 1                    | Reactant 2                            | Product 1                     | Product 2        | Product 3      | A <sub>∞</sub>       | E <sub>∞</sub> /R | n <sub>∞</sub> | A <sub>0</sub> | E <sub>0</sub> /R | n <sub>0</sub> |
|-------------------------------|---------------------------------------|-------------------------------|------------------|----------------|----------------------|-------------------|----------------|----------------|-------------------|----------------|
| NO                            | O <sub>3</sub>                        | NO <sub>2</sub>               | O <sub>2</sub>   |                | 3e-12                | 1500              | 0              | 0              | 0                 | 0              |
| NO <sub>2</sub>               | O <sub>3</sub>                        | NO <sub>3</sub>               | O <sub>2</sub>   |                | 1.2e-13              | 2450              | 0              | 0              | 0                 | 0              |
| N <sub>2</sub> O <sub>5</sub> |                                       | NO <sub>2</sub>               | NO <sub>3</sub>  |                | 9.7e+14 <sup>1</sup> | 11080             | -0.1           | 0.0013         | 11000             | 3.5            |
| N <sub>2</sub> O <sub>5</sub> |                                       | Wall loss                     |                  |                | $k_{wall}^2$         | 0                 | 0              | 0              | 0                 | 0              |
| NO <sub>3</sub>               |                                       | Wall loss                     |                  |                | $k_{wall}^2$         | 0                 | 0              | 0              | 0                 | 0              |
| NO <sub>3</sub>               | α-pinene                              | RO <sub>2</sub>               |                  |                | 1.2e-12 <sup>1</sup> | -490              | 0              | 0              | 0                 | 0              |
| NO <sub>3</sub>               | 3-carene                              | RO <sub>2</sub>               |                  |                | 9.1e-12 <sup>1</sup> | 0                 | 0              | 0              | 0                 | 0              |
| NO <sub>3</sub>               | β-pinene                              | RO <sub>2</sub>               |                  |                | 2.5e-12 <sup>1</sup> | 0                 | 0              | 0              | 0                 | 0              |
| N <sub>2</sub> O <sub>5</sub> | H <sub>2</sub> O <sub>(g)</sub>       | HNO <sub>3</sub>              | HNO <sub>3</sub> |                | 1e-22                | 0                 | 0              | 0              | 0                 | 0              |
| N <sub>2</sub> O <sub>5</sub> | H <sub>2</sub> O <sub>(aerosol)</sub> | HNO <sub>3</sub>              | HNO <sub>3</sub> |                | $k_{aer}^2$          | 0                 | 0              | 0              | 0                 | 0              |
| NO                            | NO <sub>3</sub>                       | NO <sub>2</sub>               | NO <sub>2</sub>  |                | 1.8e-11              | -110              | 0              | 0              | 0                 | 0              |
| NO <sub>2</sub>               | NO <sub>3</sub>                       | NO                            | NO <sub>2</sub>  | O <sub>2</sub> | 4.5e-14              | 1260              | 0              | 0              | 0                 | 0              |
| NO <sub>3</sub>               | NO <sub>3</sub>                       | NO <sub>2</sub>               | NO <sub>2</sub>  | O <sub>2</sub> | 8.5e-13              | 2450              | 0              | 0              | 0                 | 0              |
| NO <sub>2</sub>               | NO <sub>3</sub>                       | N <sub>2</sub> O <sub>5</sub> |                  |                | 1.9e-12 <sup>1</sup> | 0                 | -0.2           | 3.6e-30        | 0                 | 4.1            |
| NO <sub>3</sub>               | RO <sub>2</sub>                       | RO                            |                  |                | 1.5e-12              | 0                 | 0              | 0              | 0                 | 0              |
| MT mixing source              |                                       | α-pinene                      | 3-carene         | β-pinene       | 0.01 <sup>2</sup>    | 0                 | 0              | 0              | 0                 | 0              |

<sup>1</sup>Parameter values taken from IUPAC (Atkinson et al., 2004, 2006)

<sup>2</sup>See Sect. S1 for parameter details

98 **Table S2.** List of reactions and parameters used in modeling of the oxidant chemistry in the OFR when  
 99 performing O<sub>3</sub> oxidation. The rate constants are calculated using the modified Arrhenius equation  $k =$   
 100  $A \cdot \left(\frac{T(K)}{300}\right)^{-n} \cdot e^{-\frac{E}{T(K)}}$ . Parameter values are from IUPAC (Atkinson et al., 2006).

| Reactant 1     | Reactant 2 | Product 1 | A                      | E    | n |
|----------------|------------|-----------|------------------------|------|---|
| O <sub>3</sub> | α-pinene   | Products  | $8.05 \times 10^{-16}$ | 640  | 0 |
| O <sub>3</sub> | β-pinene   | Products  | $1.35 \times 10^{-15}$ | 1270 | 0 |
| O <sub>3</sub> | 3-carene   | Products  | $4.8 \times 10^{-17}$  | 0    | 0 |

104

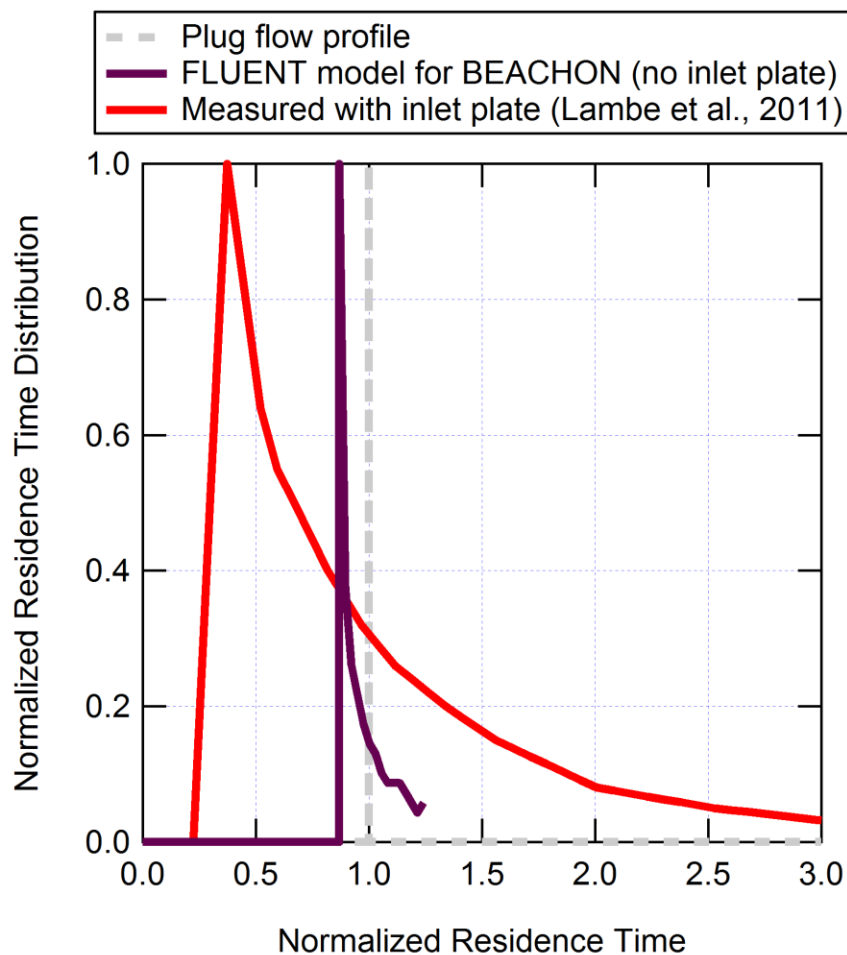

**Fig. S1.** Normalized residence time distributions in the OFR as a function of normalized residence time (1 = avg. residence time of each distribution). The FLUENT model was used to calculate the residence time for the OFR configuration without the inlet plate used during BEACHON-RoMBAS. This distribution is compared to the bis(2-ethylhexyl) sebacate (BES) particle residence time distribution measured with the inlet plate on in Lambe et al. (2011) and to the ideal plug flow distribution (where all particles have equal residence time calculated as the OFR volume divided by the total flow rate through the OFR). The residence time distribution without the inlet plate is much narrower than with the plate and is close to plug flow, though local winds will create a broader distribution than the model shows.

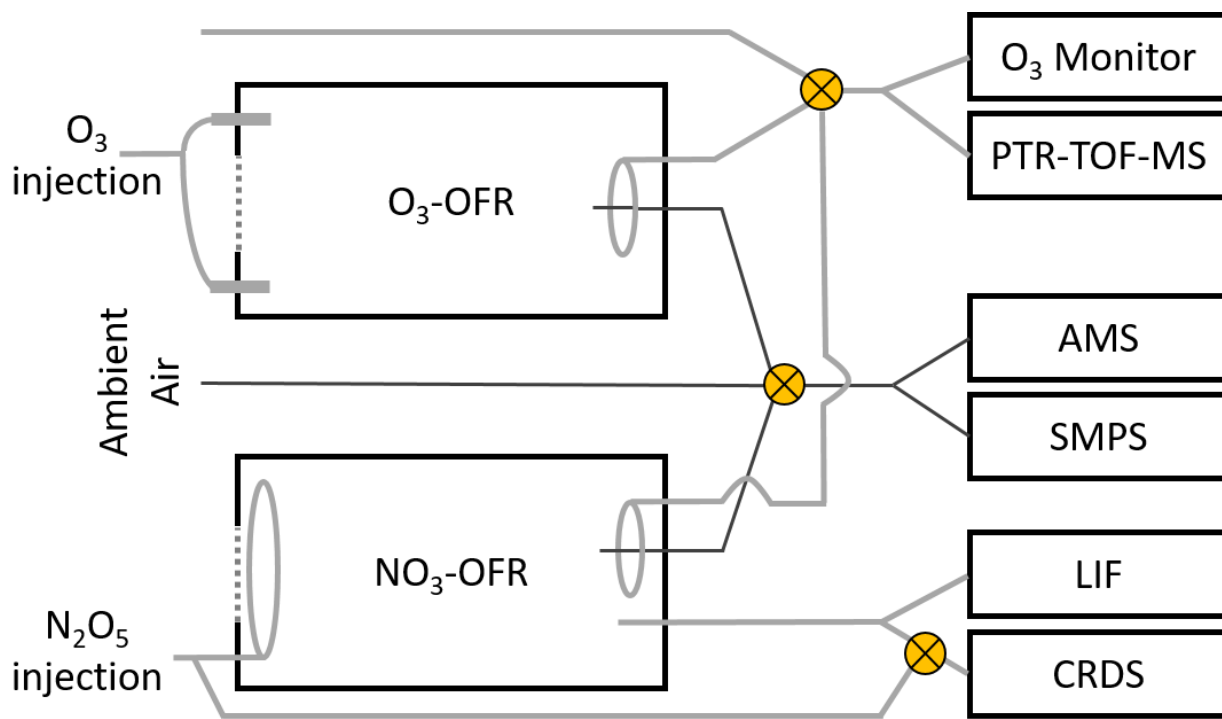

**Fig. S2.** Schematic of experimental setup of  $\text{NO}_3$ -OFR and  $\text{O}_3$ -OFR experiments.

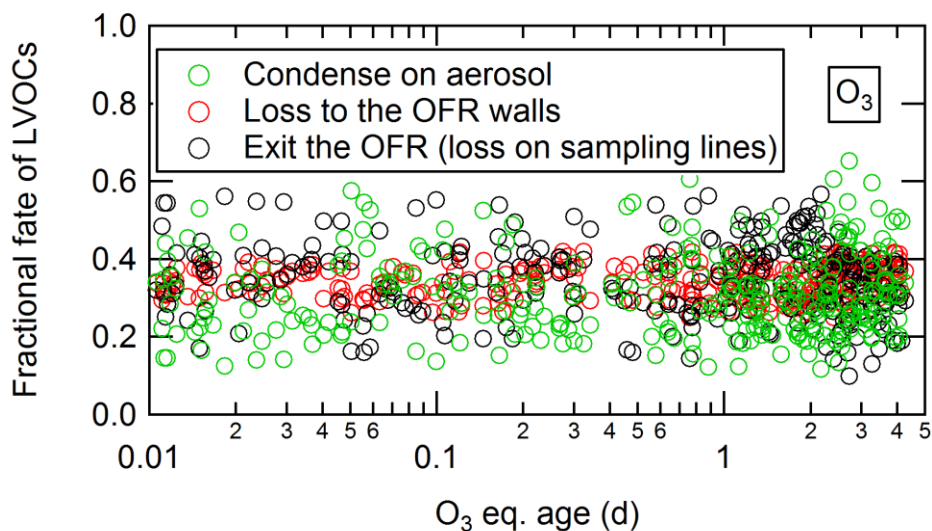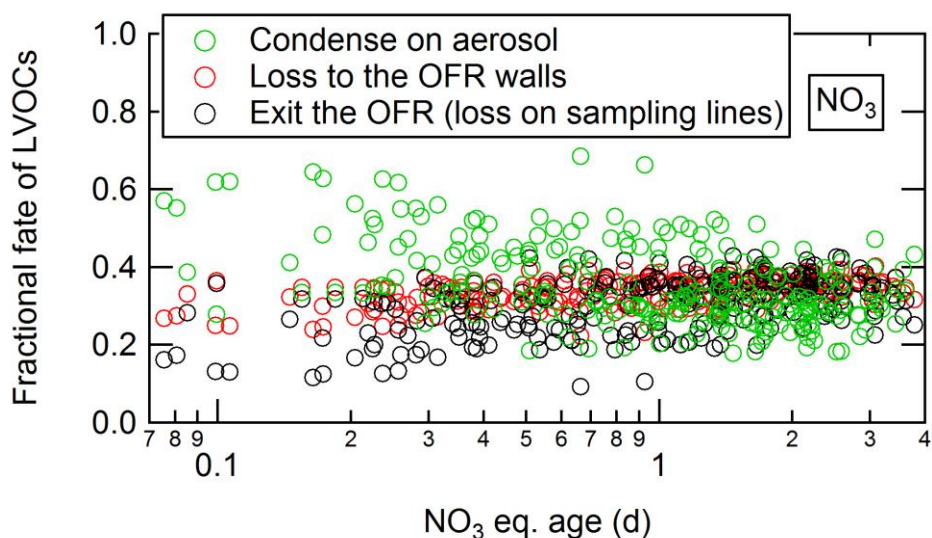

**Fig. S3.** Fractional fates of condensable low-volatility organic compounds (LVOCs) produced in the OFR, as a function of eq. age for  $\text{O}_3$  oxidation (top) and  $\text{NO}_3$  oxidation (bottom). For  $\text{O}_3$  oxidation, on average 31% of LVOCs condensed onto particles, 34% condensed on OFR walls, and 35% exited the OFR to condense on sampling line walls. For  $\text{NO}_3$  oxidation, on average 36% of LVOCs condensed onto particles, 34% condensed on OFR walls, and 30% exited the OFR to condense on sampling line walls.



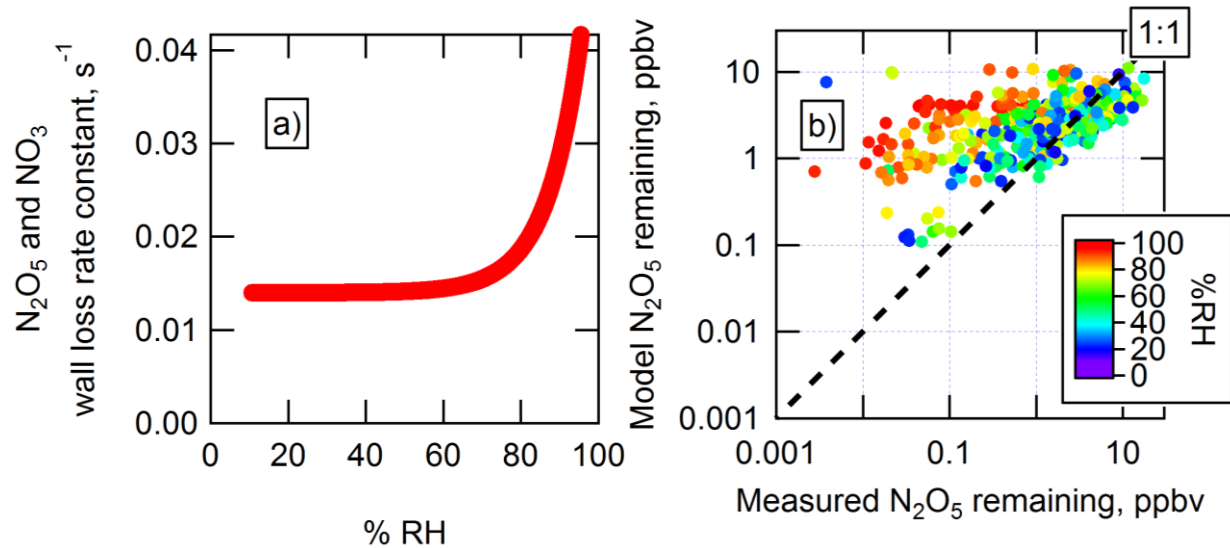

**Fig. S4.** a) The wall loss rate constant of  $\text{N}_2\text{O}_5$  and  $\text{NO}_3$  vs. %RH, determined empirically in order to achieve agreement between modeled and measured  $\text{N}_2\text{O}_5$  concentrations (Fig. 2a). b) Modeled vs. measured  $\text{N}_2\text{O}_5$  remaining (analogous to Fig. 2a), shown if the  $\text{N}_2\text{O}_5$  and  $\text{NO}_3$  wall loss rate was assumed to be a constant  $0.014 \text{ s}^{-1}$  at all %RH.

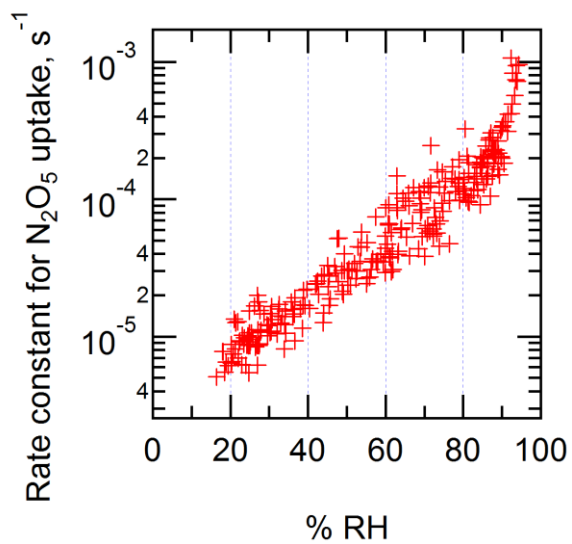

**Fig. S5.** Calculated rate constant for reactive uptake of N<sub>2</sub>O<sub>5</sub> onto particles, as a function of RH. The rate constant was calculated using the same method for condensation of gases onto aerosols described in Palm et al (2016), using the measured ambient aerosol condensational sink and using an organic-mass-fraction-corrected uptake efficiency  $\gamma(\text{N}_2\text{O}_5)$  from Gaston et al. (2014).

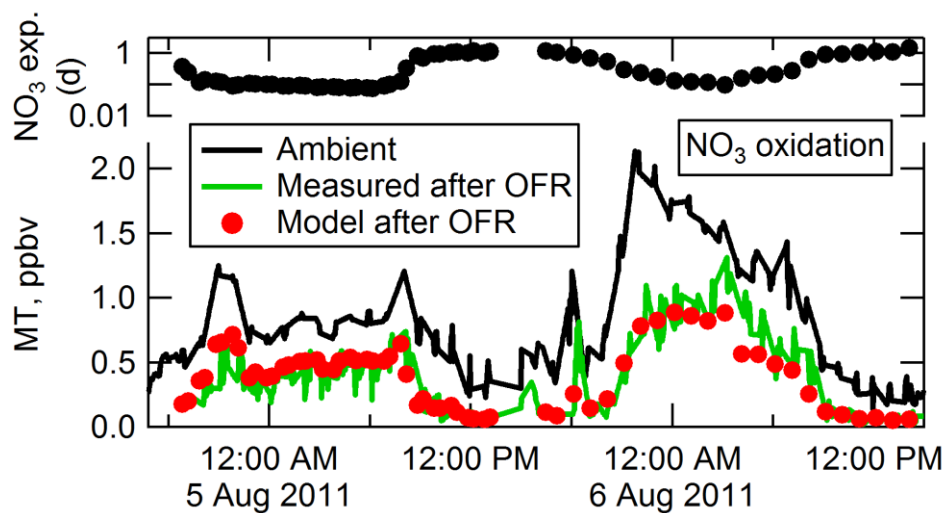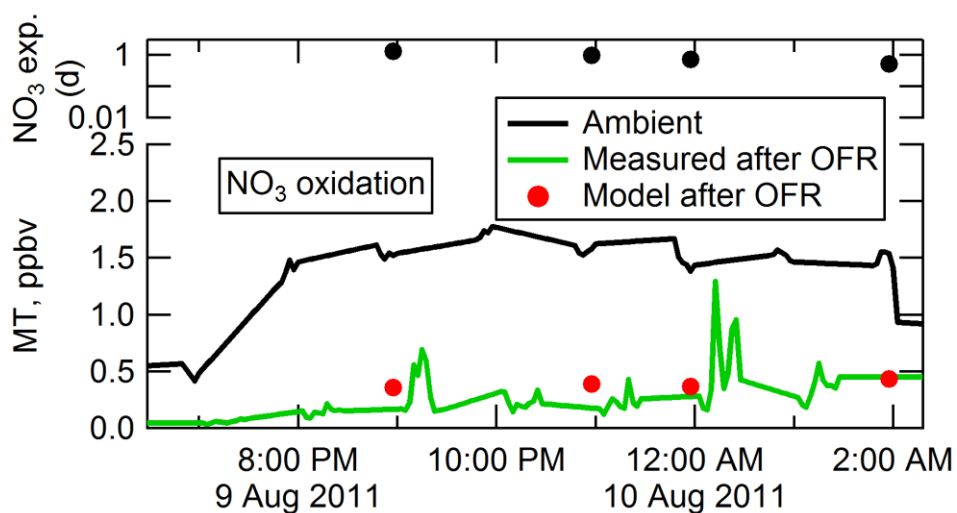

**Fig. S6.** Ambient, measured remaining, and modeled remaining MT from  $\text{NO}_3$  oxidation in the OFR on Aug. 4–6 and Aug. 9–10, along with modeled  $\text{NO}_3$  exposure (d). For these examples, the amount of injected  $\text{N}_2\text{O}_5$  was held roughly constant.

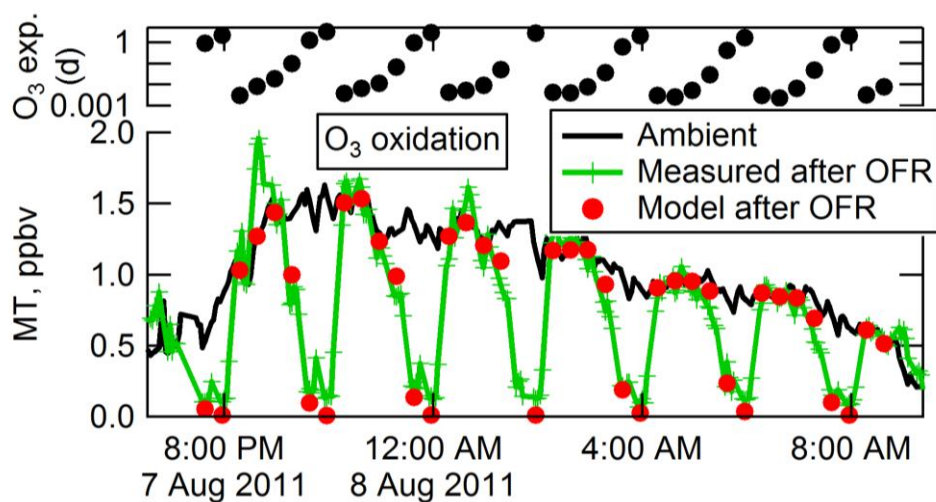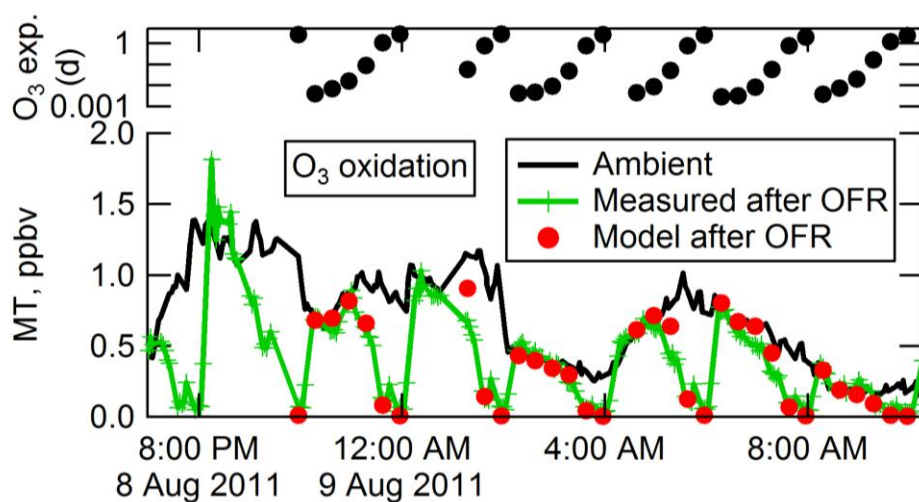

**Fig. S7.** Ambient, measured remaining, and modeled remaining MT from O<sub>3</sub> oxidation in the OFR on Aug. 7–8 and Aug. 8–9, along with modeled O<sub>3</sub> exposure (d) . The amount of oxidation was cycled from no added oxidant (no MT reacted) to maximum oxidation (most or all MT reacted) in repeated 2–3 h cycles.

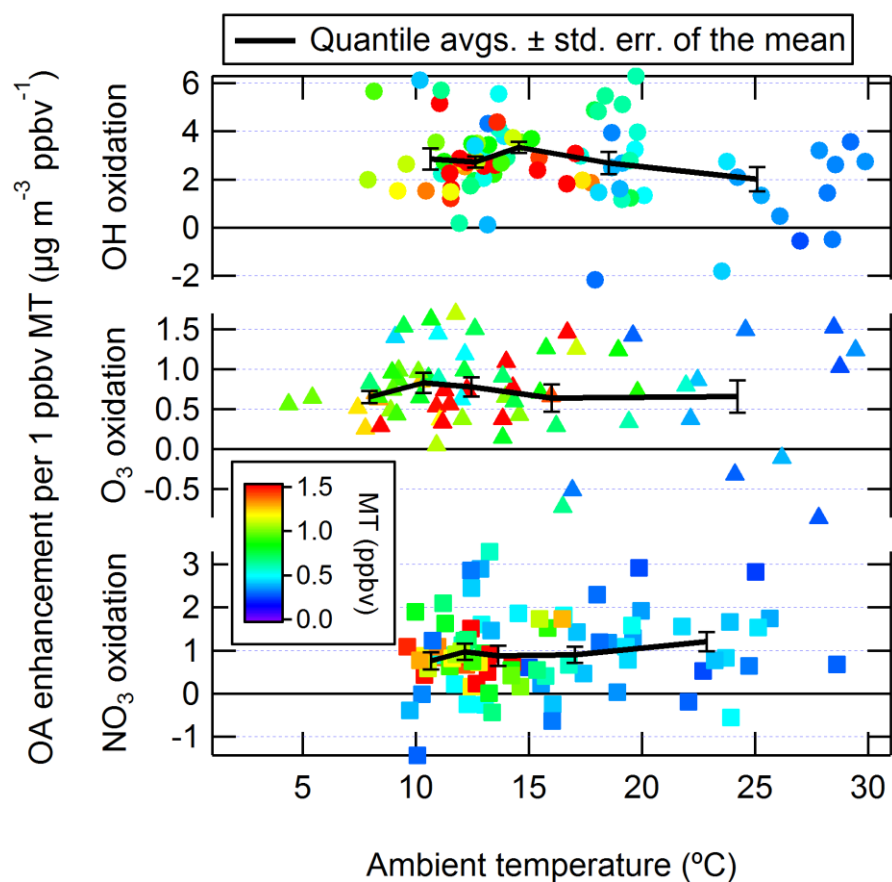

**Fig. S8.** OA enhancement per ppbv ambient MT for OH, O<sub>3</sub> and NO<sub>3</sub> oxidation in the OFR as a function of ambient temperature. Enhancement is defined as the difference between the concentrations measured after oxidation and in ambient air, where positive enhancements signify formation in the OFR. Data are colored by ambient in-canopy MT concentrations, and include the LVOC fate correction. Quantile averages are shown with error bars corresponding to the standard error of the mean of each quantile.

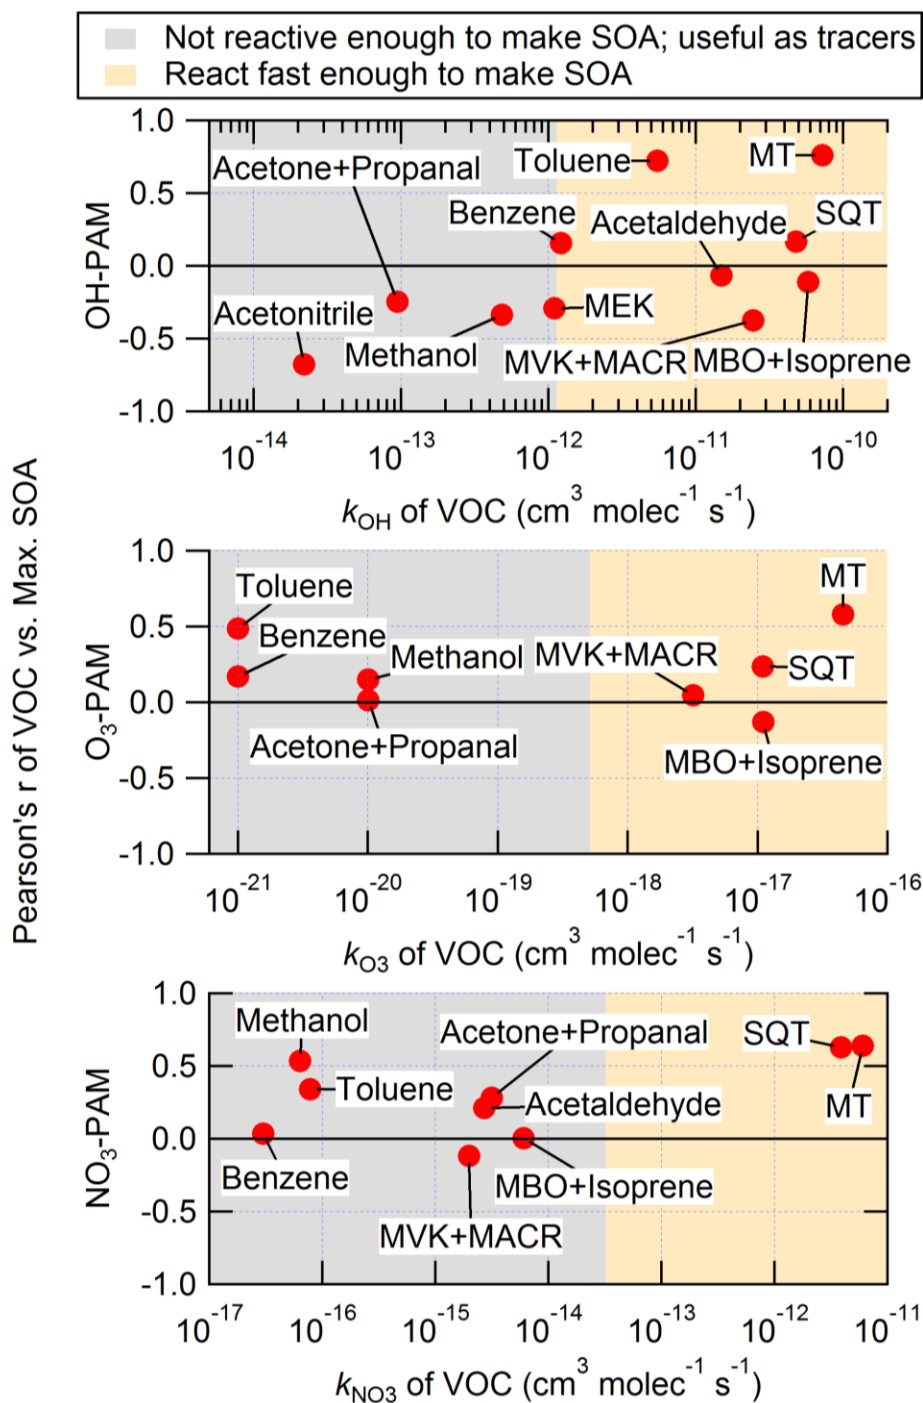

**Fig. S9.** Pearson's  $r$  for the correlation between maximum SOA formation for each oxidant and the available ambient VOC concentrations. Maximum SOA formation is defined as the ranges of 0.4–1.5 eq. d for OH-PAM, 0.7–5 eq. d for O<sub>3</sub>-PAM, 0.3–4 eq. d for NO<sub>3</sub>-PAM. Reaction rate constants are taken from Atkinson and Arey (2003) and the IUPAC database (Atkinson et al., 2006). The orange colored background denotes rate constants that are fast enough so that  $\geq 20\%$  of the VOC can react to form SOA under the conditions of maximum SOA formation in the OFR for each oxidant. In contrast, the grey background shows rate constants where the molecules do not react in the OFR and cannot contribute to SOA formation, but could be useful as tracers.

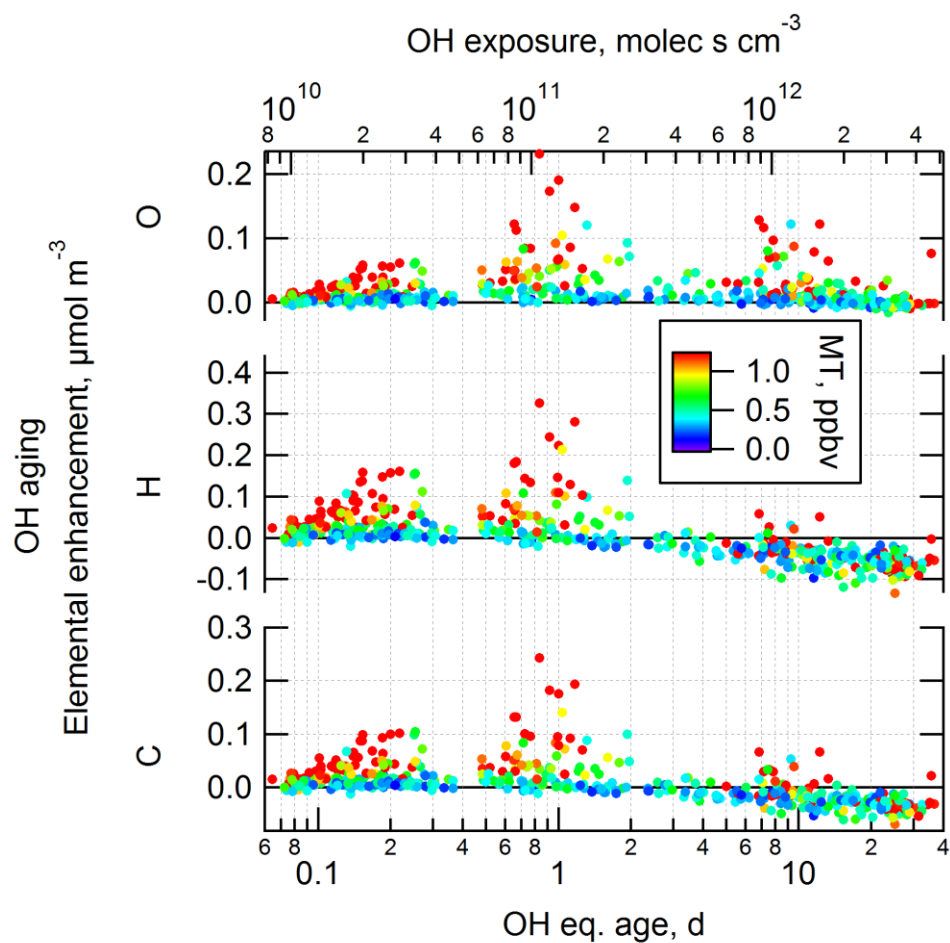

**Fig. S10.** Elemental C, H, and O enhancements due to OH aging in the OFR, as a function of eq. OH age and exposure. Enhancement is defined as the difference between the concentrations measured after oxidation and in ambient air, where positive enhancements signify formation in the OFR. Data are colored by ambient in-canopy MT concentrations, and do not include the LVOC fate correction.

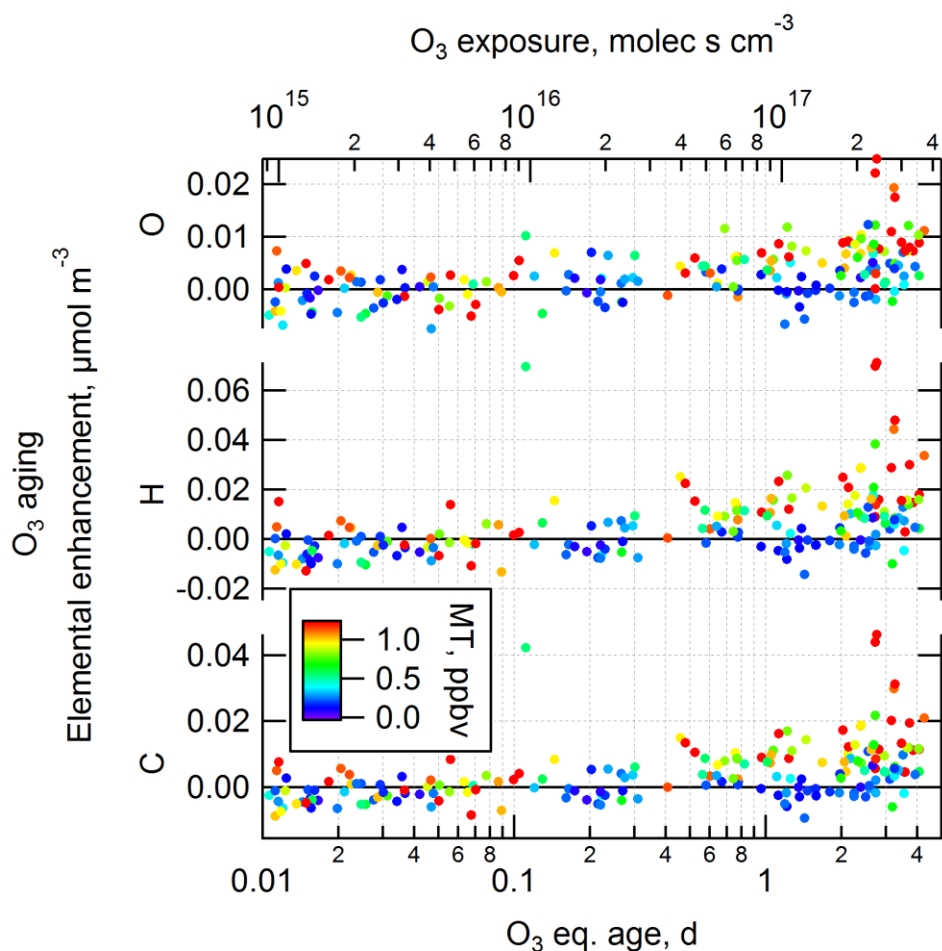

**Fig. S11.** Elemental C, H, and O enhancements due to O<sub>3</sub> aging in the OFR, as a function of eq. O<sub>3</sub> age and exposure. Enhancement is defined as the difference between the concentrations measured after oxidation and in ambient air, where positive enhancements signify formation in the OFR. Data are colored by ambient in-canopy MT concentrations, and do not include the LVOC fate correction.



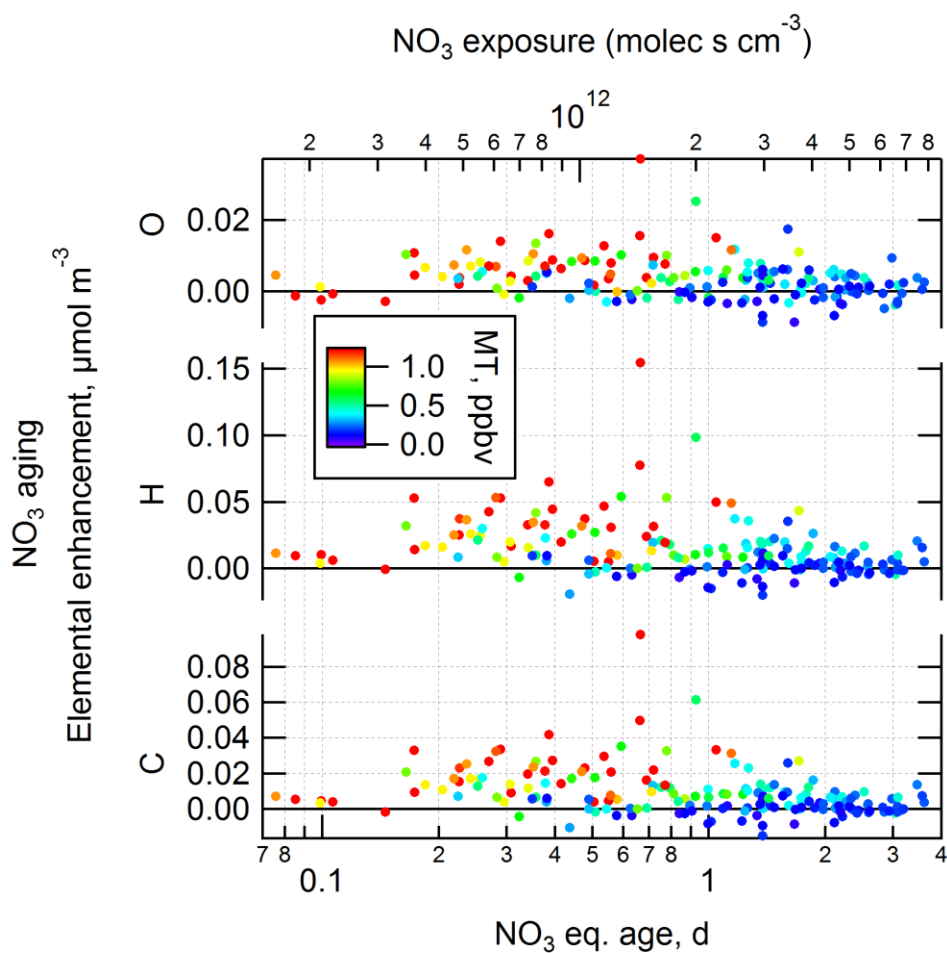

**Fig. S12.** Elemental C, H, and O enhancements due to  $\text{NO}_3$  aging in the OFR, as a function of eq.  $\text{NO}_3$  age and exposure. Enhancement is defined as the difference between the concentrations measured after oxidation and in ambient air, where positive enhancements signify formation in the OFR. Data are colored by ambient in-canopy MT concentrations, and do not include the LVOC fate correction.

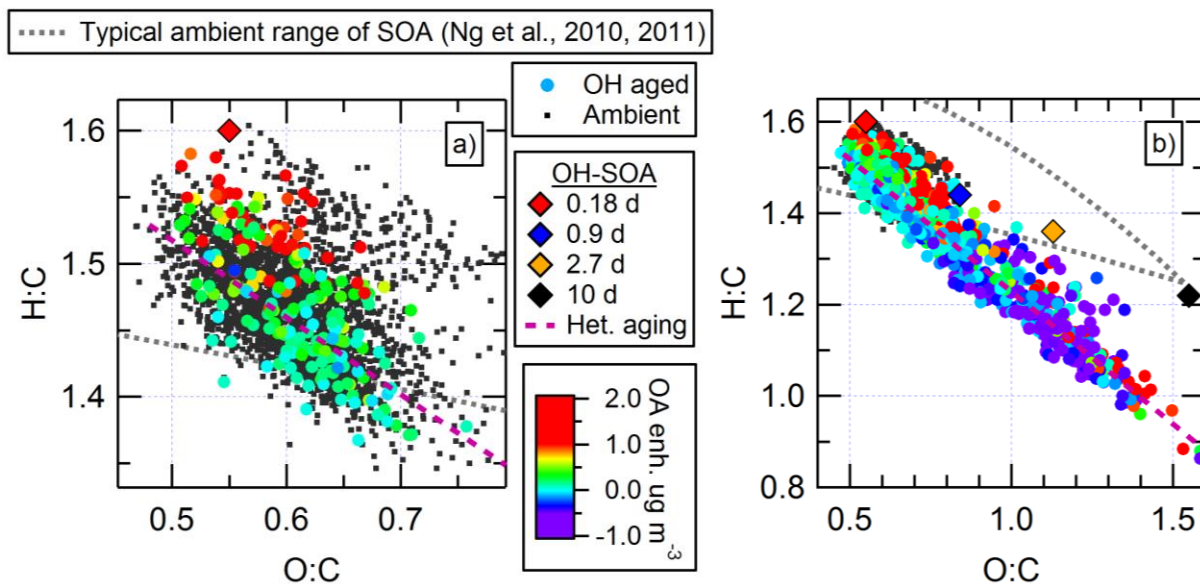

**Fig. S13.** Van Krevelen diagrams of H:C vs. O:C ratios of OA after OH oxidation of ambient air in an OFR, along with values for ambient OA. OH aged data are colored by the amount of OA enhancement observed after oxidation. The H:C and O:C ratios of the new SOA mass formed in the OFR (i.e., the slopes from Fig. 8) are shown (diamonds; see Fig. 11). For data where no net C addition was observed after OH oxidation, the slope along which heterogeneous OH oxidation transforms the ambient OA is shown (purple dashed line). Panel a) shows only data in the eq. range of 0.1–0.4 (avg.=0.18) d, while panel b) shows all data.
